# Supplementary material
Source: ML conference proceedings conference paper supplement (https://proceedings.neurips.cc/paper_files/paper/2017/hash/619205da514e83f869515c782a328d3c-Abstract.html)
Supplement: Supplementary file [file 619205da514e83f869515c782a328d3c-Supplemental.zip]

---

# SUPPLEMENT FOR: Improved Graph Laplacian via Geometric Self-Consistency

---

**Dominique C. Perrault-Joncas**  
Google, Inc.  
dominiquep@google.com

**Marina Meilă**  
Department of Statistics  
University of Washington  
mmp2@uw.edu

**James McQueen**  
Amazon  
jmcq@amazon.com

## 1 Additional experimental results

### 1.1 Example displaying the cost function for choosing $\epsilon$

This example uses semi-supervised learning (SSL) dataset g241d.

Figure 1 (a) shows the distortion  $D$  that our algorithm minimizes to find the optimal  $\epsilon$  for the given data set. Figure 1 (b) illustrates the range of  $\epsilon$  chosen by the CLMR method. The CLMR range is  $[\epsilon_1, \epsilon_2]$  with  $\epsilon_1$  the smallest  $\epsilon$  value for which  $\lambda_{K+1}$  is non-increasing and  $\epsilon_2$  the smallest value for which  $\lambda_1$  is non-decreasing. For this particular data set, the CLMR range is approximately  $[100, 300]$  for  $K > 1$  ( $K$  is an upper bound on the intrinsic dimension  $d$  of the data). Hence, the CLMR method would choose an  $\hat{\epsilon}$  of at least 100 (200 if the middle of the CLMR interval is used).

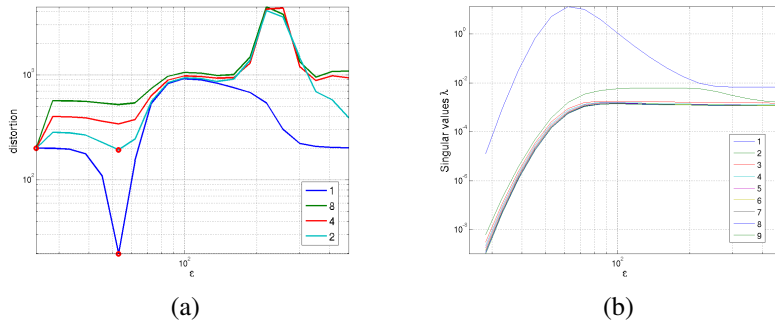

Figure 1: Dataset g241d. (a) costs  $\hat{D}$  for one sample of  $N' = 200$  and  $d' = 1, 2, 4, 8$ , showing pronounced minimum at  $\hat{\epsilon} = 53.1$  for  $d' = 1$  (the lowest curve) and a weaker minimum for  $d' = 2$ ; the range of  $\epsilon$  searched was  $[24, 482]$  (b) the nine largest singular values of local SVD versus  $\epsilon$ . We do not know the intrinsic dimension of these high-dimensional data. The figure shows why using a low dimensional projection, e.g.  $d' = 1$  may be a practical strategy. One sees also that choosing  $\epsilon$  by the CLMR will result in values of at least 100 – 300, depending which parameter  $K > 1$  is chosen. The value chosen by crossvalidation is 54.

### 1.2 Experiments with smoothing

Figure 2 shows the results of the experiments with smoothing within the main paper for additional noise amplitudes.

### 1.3

This behavior is largely due to what happens at large values of  $\epsilon$ . At these values, the geometry converges to the degenerate case of the single point, for which  $\|g\| \rightarrow 0$  (there are no longer any distances to be measured). This means that, when  $g_{\mathbb{R}^r}|_{T\mathcal{M}}$  is compared to  $g$ , the result is simply the 0 matrix minus the identity matrix, which is just the norm of the identity matrix in  $d$  dimensions. Therefore, the distortion converges to a small value as  $\epsilon \rightarrow \infty$ , and for finite samples, this value may be even smaller than the one resulting from the use of the optimal  $\epsilon$ . In contrast, when  $\|g\| \rightarrow 0$ , the dual metric  $\|h\| \rightarrow \infty$ , so the computed distortion from  $g_{\mathbb{R}^r}|_{T\mathcal{M}}$  is going to be very high even for finite samples.

### 1.4 SDSS Data Embedding

The data consists of spectra of galaxies from the Sloan Digital Sky Survey. We extracted a subset of spectra whose signal-to-noise-ratio was sufficiently high, known as the *main sample*.

This set contains 675,000 galaxies observed in  $D = 3750$  spectral bins. The data were pre-processed by first moving them to a common rest-frame wavelength and then filling-in missing data using weighted PCA.

In figure 3 we display a three-dimensional embedding of the main sample of galaxy spectra from the Sloan Digital Sky Survey. Colors in the above figure indicate the strength of Hydrogen alpha emission, a very nonlinear feature which requires dozens of dimensions to be captured in a linear embedding. The continuous variation of this feature is also indication of a smooth embedding. Additionally in figure 4 we display a region of this embedding along with the estimated Riemannian metrics at a subset of the points. The continuity of the Riemannian metrics across the embedding are evidence of a smooth embedding.

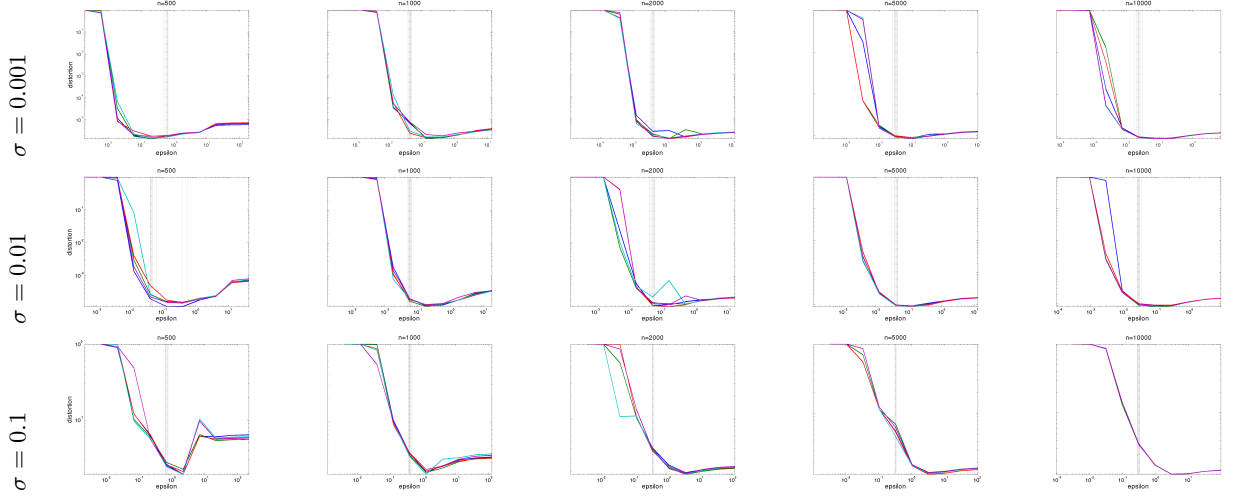

Figure 2: Distortions between embedding of noisy and of noiseless manifold data, for various  $\epsilon$  values sample sizes  $n$ , and noise levels  $\sigma$ . The manifold is the `hourglass`, embedding in 3D by Laplacian Eigenmap, data in 13 dimensions;  $\epsilon$  is the scale for the noisy data embedding, and the distortion shown is the lowest over all  $\epsilon^*$  values for the noiseless data embedding; there were 5 replications in each experiment. The vertical lines are the same  $\hat{\epsilon}$  from Figure 1 in the paper (10 replicates). One sees that  $\hat{\epsilon}$  underestimates the minimum of the distortion, but is in the ball park. Note the large interval of small distortion and the comparatively small variance of  $\hat{\epsilon}$ .

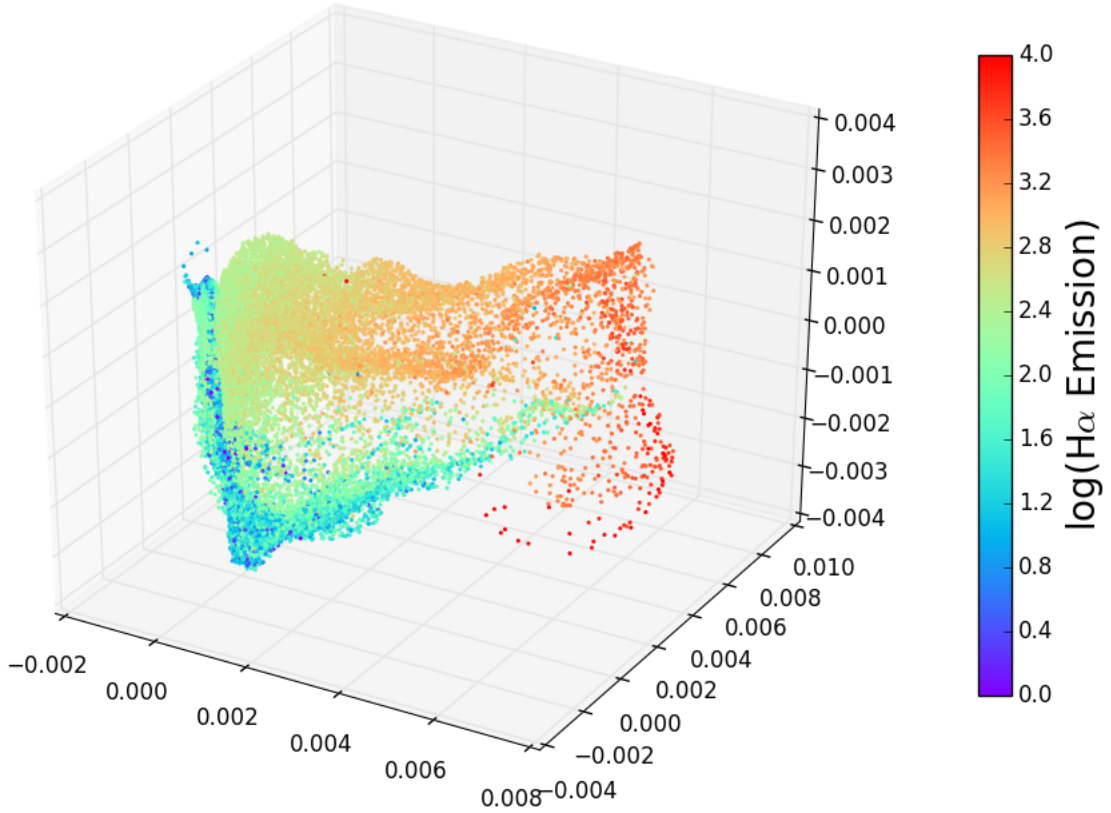

Figure 3: SDSS galaxy embedding with hydrogen alpha.

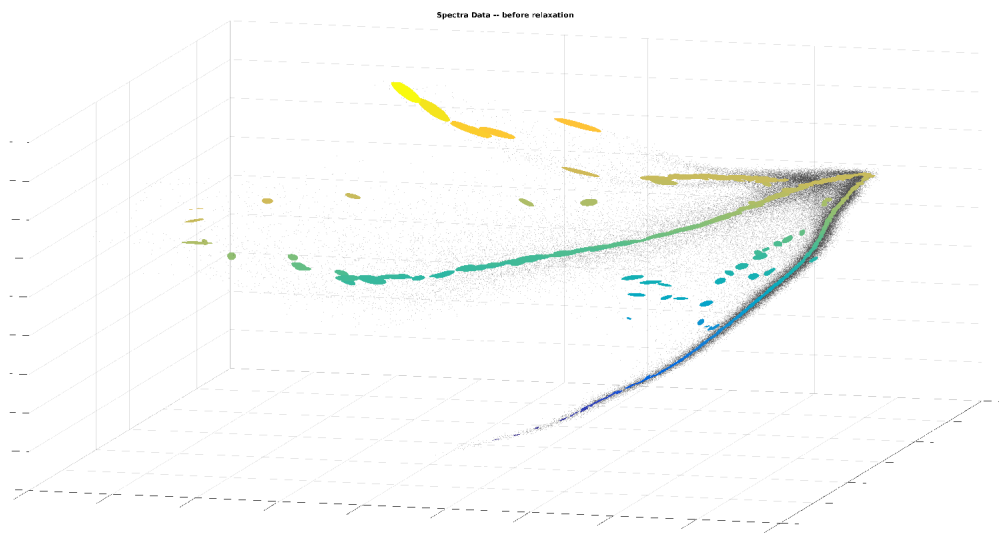

Figure 4: A portion of the embedding is displayed along with the estimated Riemannian Metrics at a subset of the points. .
